# Supplementary material for: Synthesis of Bi4Ti3O12 decussated nanoplates with enhanced piezocatalytic activity
Source: Royal Society of Chemistry journal article supplement (doi:10.1039/c9nr07544e), 2019-01-01
Supplement: c9nr07544e1.pdf [file c9nr07544e1.pdf]

## Supporting Information

### **Synthesis of $\text{Bi}_4\text{Ti}_3\text{O}_{12}$ decussated nanoplates with enhanced piezocatalytic activity**

Jiang Wu, Ni Qin\*, Enzhu Lin, Baowei Yuan, Zihan Kang, Dinghua Bao\*

State Key Laboratory of Optoelectronic Materials and Technologies, School of  
Materials Science and Engineering, Sun Yat-Sen University, Guangzhou 510275,  
China

**\*Corresponding authors.**

**E-mail addresses:** qinni2@mail.sysu.edu.cn, stsbdh@mail.sysu.edu.cn

## SI 1. Characterization of the $\text{Na}_2\text{Ti}_3\text{O}_7$ precursor

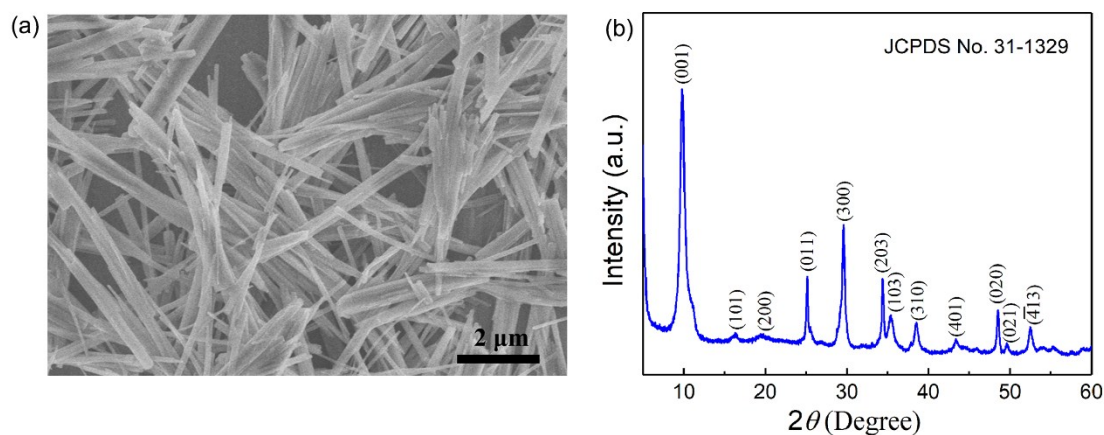

**Figure S1.** (a) SEM image and (b) XRD pattern of  $\text{Na}_2\text{Ti}_3\text{O}_7$  nanowires.

## SI 2. Synthetic parameters of the $\text{Bi}_4\text{Ti}_3\text{O}_{12}$ nanomaterials

**Table S1.** Synthetic parameters for preparing  $\text{Bi}_4\text{Ti}_3\text{O}_{12}$  nanomaterials.

| Sample name | Method and condition                           | NaOH<br>( $\text{mol}\cdot\text{L}^{-1}$ ) | Starting materials                         |                                                           |
|-------------|------------------------------------------------|--------------------------------------------|--------------------------------------------|-----------------------------------------------------------|
|             |                                                |                                            | Ti source                                  | Bi source                                                 |
| t-BiT-1M    | template hydrothermal process, 200 °C for 48 h | 1                                          | 0.15g $\text{Na}_2\text{Ti}_3\text{O}_7$   | 0.97g $\text{Bi}(\text{NO}_3)_3\cdot 5\text{H}_2\text{O}$ |
| t-BiT-3M    | template hydrothermal process, 200 °C for 48 h | 3                                          | 0.15g $\text{Na}_2\text{Ti}_3\text{O}_7$   | 0.97g $\text{Bi}(\text{NO}_3)_3\cdot 5\text{H}_2\text{O}$ |
| t-BiT-5M    | template hydrothermal process, 200 °C for 48 h | 5                                          | 0.15g $\text{Na}_2\text{Ti}_3\text{O}_7$   | 0.97g $\text{Bi}(\text{NO}_3)_3\cdot 5\text{H}_2\text{O}$ |
| o-BiT-1     | one-pot hydrothermal process, 200 °C for 48 h  | 3                                          | 0.12g $\text{TiO}_2$                       | 0.97g $\text{Bi}(\text{NO}_3)_3\cdot 5\text{H}_2\text{O}$ |
| o-BiT-2     | one-pot hydrothermal process, 200 °C for 48 h  | 3                                          | 0.51g $\text{Ti}(\text{OC}_4\text{H}_9)_4$ | 0.97g $\text{Bi}(\text{NO}_3)_3\cdot 5\text{H}_2\text{O}$ |
| s-BiT       | solid state reaction, 800 °C for 2 h           | \                                          | $\text{TiO}_2$                             | $\text{Bi}_2\text{O}_3$                                   |

### SI 3. EDS analysis of the $\text{Bi}_4\text{Ti}_3\text{O}_{12}$ samples

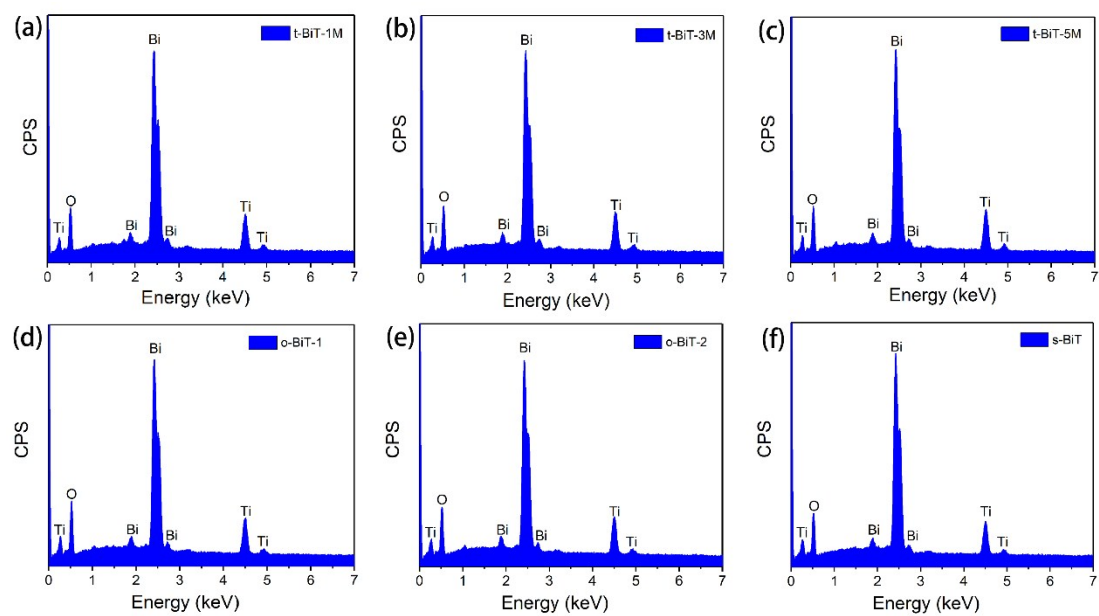

**Figure S2.** EDS patterns of (a) t-BiT-1M, (b) t-BiT-3M, (c) t-BiT-5M, (d) o-BiT-1, (e) o-BiT-2 and (f) s-BiT.

## SI 4. Optical absorption spectra of dye solutions in the piezocatalytic degradation

process

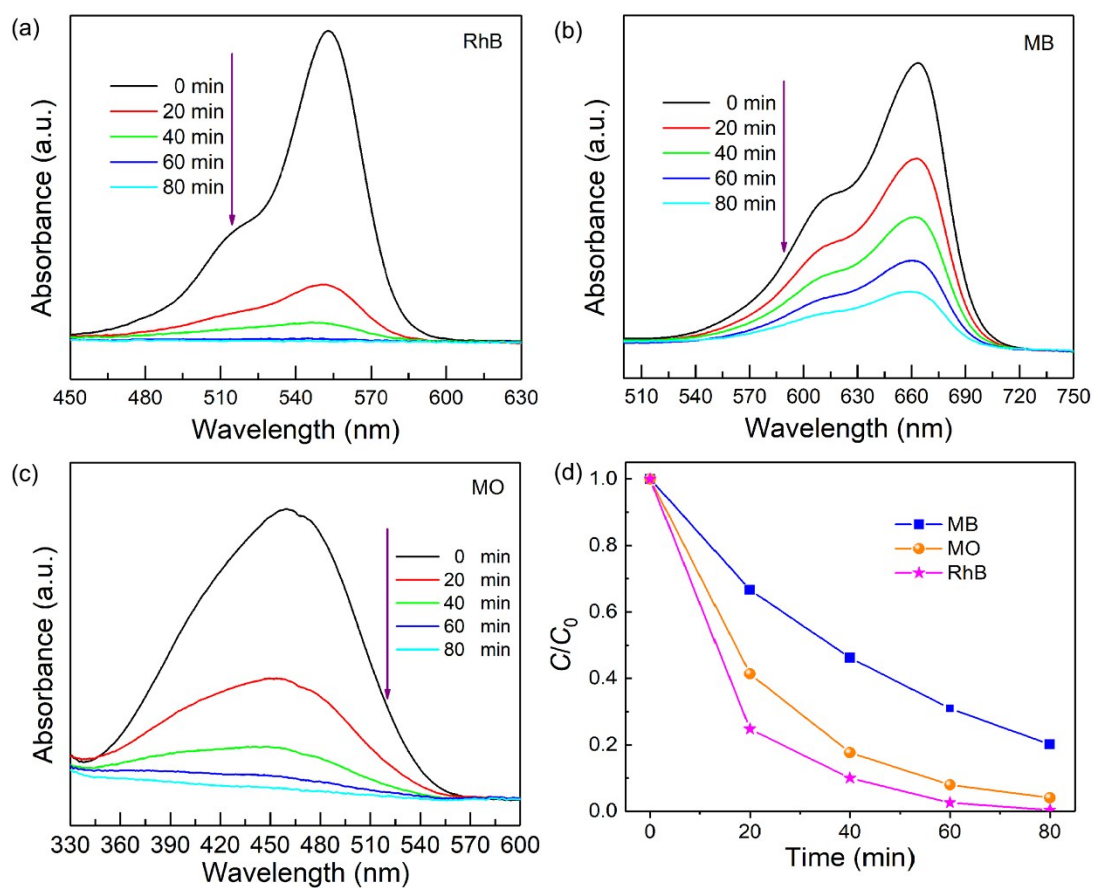

**Figure S3.** UV-vis absorption spectra of (a) RhB, (b) MB and (c) MO aqueous solutions at different time of degradation over t-BiT-3M piezocatalyst. (d) Variation of dye concentration as a function of time.

### SI 5. Cycling stability of the t-BiT-3M piezocatalyst

To evaluate the cyclic stability of the piezocatalyst, the degradation experiment was repeated using recycled t-BiT-3M. As shown in **Figure S4**, a similar level of activity was maintained after four cycles of the degradation experiment, indicating a high cycling stability of the present piezocatalyst.

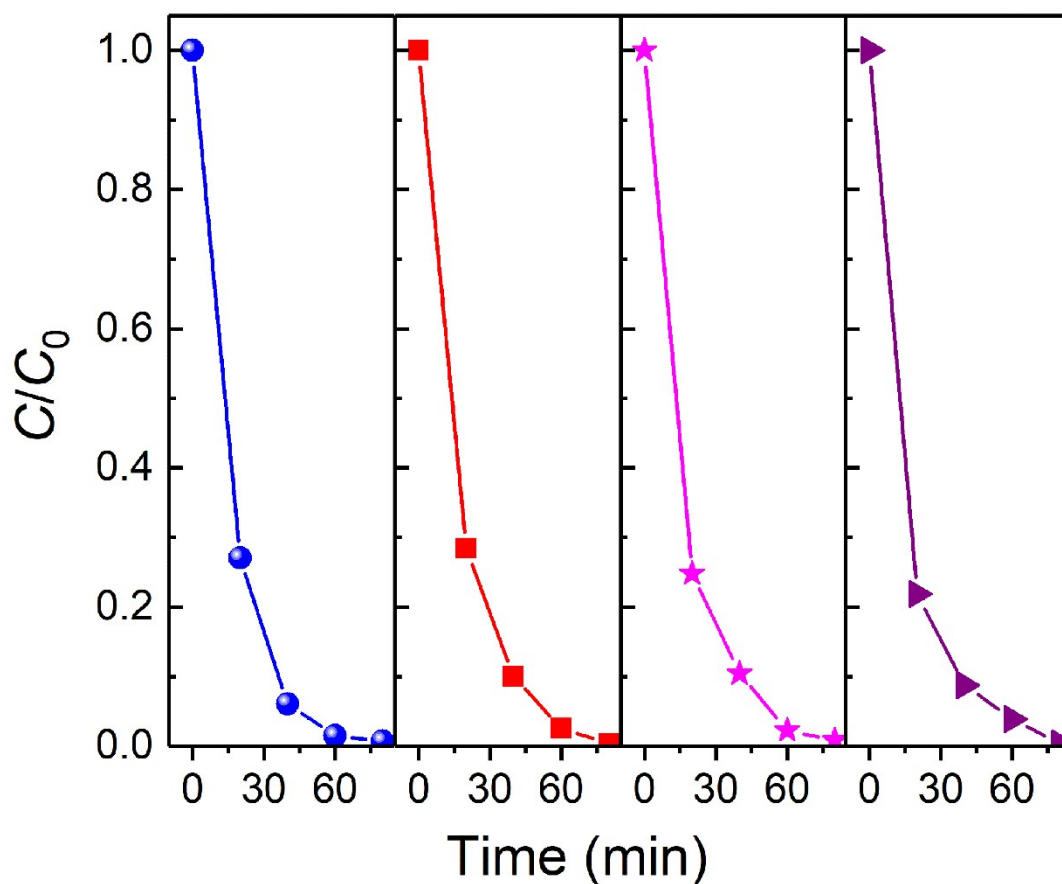

**Figure S4.** Plots of the relative intensity of the maximum absorption at 460 nm as a function of reaction time in four recycling processes.

## SI 6. Evaluation of specific surface area

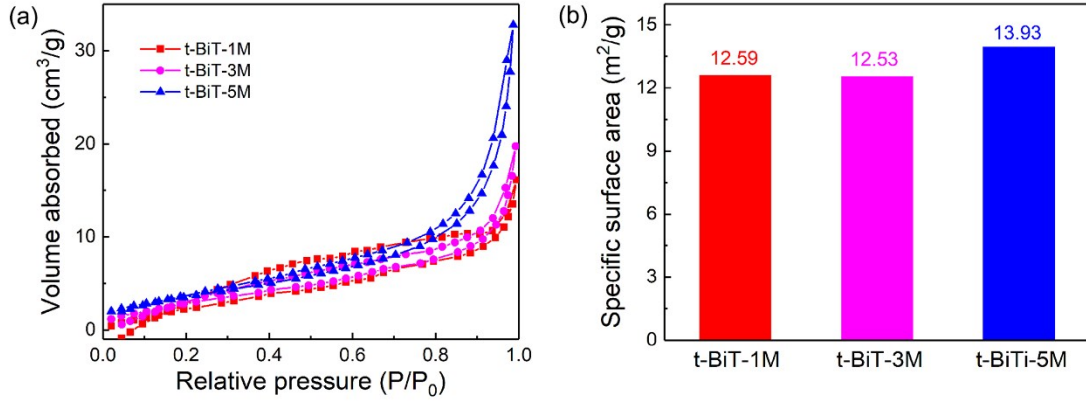

**Figure S5.**  $N_2$  adsorption and desorption isotherms and specific surface area of  $Bi_4Ti_3O_{12}$ .

## SI 7. Material parameters used in Comsol Multiphysics simulation

Because barium titanate is not defined in the data base of Comsol Multiphysics software package, the material parameters required by simulation were collected or calculated from literature. The theoretical density ( $\rho$ ) of  $Bi_4Ti_3O_{12}$  is  $8039 \text{ kg m}^{-3}$  according to the standard JCPDS Card No. 73-2181. The relative permittivity ( $\epsilon_r$ ) of the anisotropic crystal (monoclinic) is expressed as a diagonal tensor:[1]

$$\epsilon_r = \begin{bmatrix} 120 & 0 & 0 \\ 0 & 205 & 0 \\ 0 & 0 & 140 \end{bmatrix} \quad (1)$$

The piezoelectric constants ( $d$ ) of crystals are also closely related to the crystal symmetry. The  $d$ -matrix, or namely coupling matrix ( $eES$ ), can be expressed as

$$eES = d_{ij} = \begin{bmatrix} d_{11} & d_{12} & d_{13} & 0 & d_{15} & 0 \\ 0 & 0 & 0 & d_{24} & 0 & d_{26} \\ d_{31} & d_{32} & d_{33} & 0 & d_{35} & 0 \end{bmatrix} \quad (2)$$

corresponding to the monoclinic symmetry.[2] Based on a calculation using the known temperature dependence of the spontaneous polarization, lattice strain and dielectric permittivity, Neto and Cross worked out with an equivalent piezoelectric constant: [2]

$$eES = \begin{bmatrix} 44 & 18 & -48 & 0 & 1 & 0 \\ 0 & 0 & 0 & 0.8 & 0 & {}_m d_{26} \\ -75 & -76 & 269 & 0 & 12 & 0 \end{bmatrix} \text{pC} \cdot \text{N}^{-1}. \quad (3)$$

The calculated  $d_{11}$  (44 pC·N<sup>-1</sup>) is close to the measured value (39 pC·N<sup>-1</sup>) of a single domain single crystal of Bi<sub>4</sub>Ti<sub>3</sub>O<sub>12</sub>, while the calculated  $d_{33}$  value ( $d_{33} = 269$  pC·N<sup>-1</sup>) deviates too much from the real measurement ( $d'_{33} = 9$  pC·N<sup>-1</sup>).[2] The big error in  $d_{33}$  calculation might be caused by an overestimation of the out-of-plane component of the spontaneous polarization ( $P_3$ ). According to the functions used for calculation (see Equation 14 to 24 in Ref. [2]), all the  $d_{3j}$  and  $d_{i3}$  ( $i, j = 1, 2$  and  $3$ ) constants are proportional to the  $P_3$  value. It is reasonable to reduce the  $d_{3j}$  and  $d_{i3}$  constants with a uniform proportion

$$d'_{ij} = \delta d_{ij} \quad (4)$$

The proportional coefficient  $\delta$  can be estimated by

$$\delta = \frac{d'_{33}}{d_{33}} = \frac{9}{269} = 0.0334 \quad (5)$$

which consequently leads to

$$eES = \begin{bmatrix} 44 & 18 & -1.6 & 0 & 1 & 0 \\ 0 & 0 & 0 & 0.8 & 0 & {}_m d_{26} \\ -2.5 & -2.5 & 9 & 0 & 0.4 & 0 \end{bmatrix} \text{pC} \cdot \text{N}^{-1} \quad (6)$$

The  $d$  constants described in Equation 6 have been used for simulation in this work.

In principle, the compliance matrix ( $sE$ ) of monoclinic crystals contain 13 independent components

$$sE = s_{ij} = \begin{bmatrix} s_{11} & s_{12} & s_{13} & 0 & s_{15} & 0 \\ s_{12} & s_{22} & s_{23} & 0 & s_{25} & 0 \\ s_{13} & s_{23} & s_{33} & 0 & s_{35} & 0 \\ 0 & 0 & 0 & s_{44} & 0 & s_{46} \\ s_{15} & s_{25} & s_{35} & 0 & s_{55} & 0 \\ 0 & 0 & 0 & s_{46} & 0 & s_{66} \end{bmatrix}. \quad (7)$$

Because the crystal structure symmetry of bismuth titanate is close to tetragonal, the  $s$ -matrix can be approximately described by six independent constants as follows,

$$sE = \begin{bmatrix} s_{11} & s_{12} & s_{13} & 0 & 0 & 0 \\ s_{12} & s_{11} & s_{13} & 0 & 0 & 0 \\ s_{13} & s_{13} & s_{33} & 0 & 0 & 0 \\ 0 & 0 & 0 & s_{44} & 0 & 0 \\ 0 & 0 & 0 & 0 & s_{44} & 0 \\ 0 & 0 & 0 & 0 & 0 & s_{66} \end{bmatrix}. \quad (8)$$

The primary  $s$  constants of  $\text{Bi}_4\text{Ti}_3\text{O}_{12}$  have been proposed by Kitanaka et al. [3] as  $s_{11} = 7.9 \text{ Pa}^{-1}$ ,  $s_{33} = 13 \text{ Pa}^{-1}$  and  $s_{66} = 17 \text{ Pa}^{-1}$ . The other  $s$ -constants can be deduced from the primary  $s$ -constants, Young's modulus ( $E$ ), Poisson's ratio ( $\mu$ ) and shear modulus ( $G$ ) by

$$s_{12} = \mu_{12}s_{11} \quad (9)$$

$$s_{13} = \mu_{13}s_{11} \quad (10)$$

$$s_{44} = \frac{1}{G_{13}} = \frac{2(1 + \mu_{13})}{E_1} = s_{11} \cdot 2(1 + \mu_{13}). \quad (11)$$

The Poisson's ratio of tetragonal perovskites  $\text{BaTiO}_3$  and  $\text{PbTiO}_3$  were determined based on the predefined  $s$ -constant in Comsol Multiphysics as  $\mu_{12} = -0.29$  and  $\mu_{13} = -0.33$ . The calculation finally results in



$$sE = \begin{bmatrix} 7.9 & -2.3 & -2.6 & 0 & 0 & 0 \\ -2.3 & 7.9 & -2.6 & 0 & 0 & 0 \\ -2.6 & -2.6 & 13 & 0 & 0 & 0 \\ 0 & 0 & 0 & 10.6 & 0 & 0 \\ 0 & 0 & 0 & 0 & 10.6 & 0 \\ 0 & 0 & 0 & 0 & 0 & 17 \end{bmatrix} \text{Pa}^{-1} \quad (12)$$

### SI 8. Mass spectra of the degradation byproducts of RhB

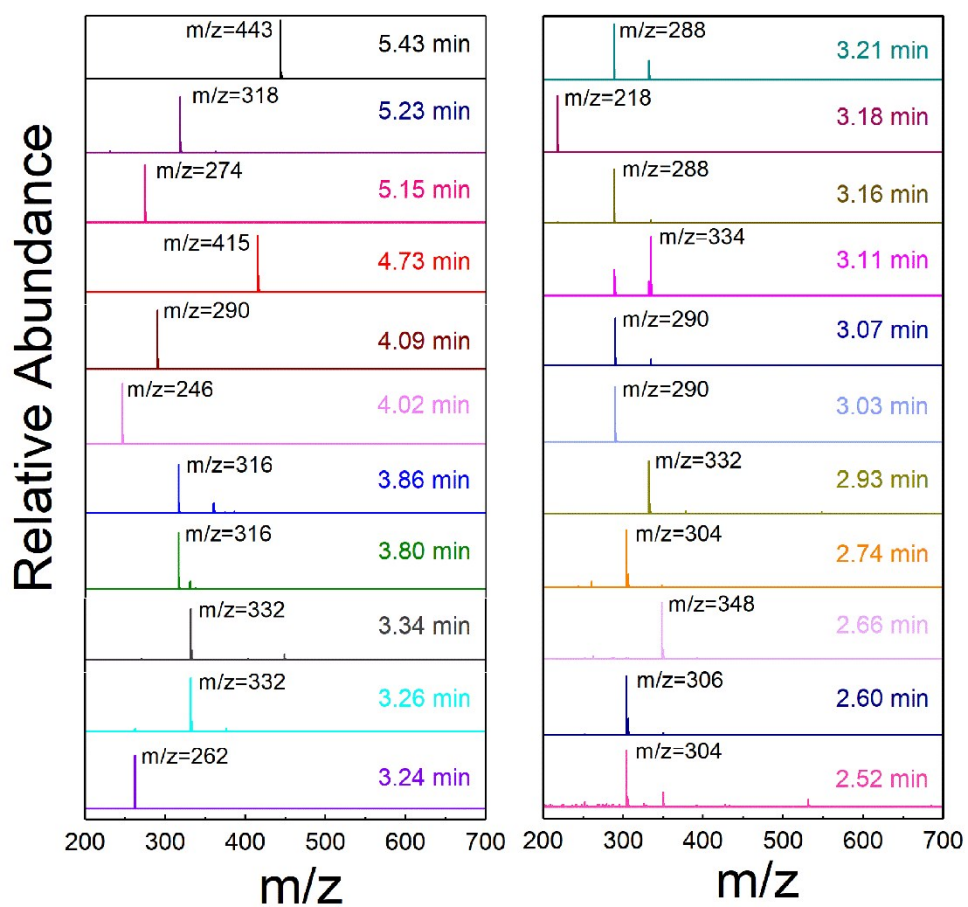

**Figure S6.** Mass spectra of the degradation byproducts of RhB.

**References:**

- [1] A. Fouskova, L.E. Cross, Dielectric properties of bismuth titanate, *J. Appl. Phys.* 41 (1970) 2834-2838.
- [2] L.E.C. A. Sa Neto, Electro-mechanical behaviour of single domain single crystals of bismuth titanate ( $\text{Bi}_4\text{Ti}_3\text{O}_{12}$ ), *J. Mater. Sci.* 17 (1982) 1409-1412.
- [3] Y. Kitanaka, Y. Noguchi, M. Miyayama, Y. Kagawa, Elastic and piezoelectric properties of high-quality ferroelectric  $\text{Bi}_4\text{Ti}_3\text{O}_{12}$  single crystals, *Jpn. J. Appl. Phys.* 51 (2012) 09LD08.
